# Supplementary material for: Use of anN-heterocyclic carbene (NHC)-based interacting Lewis pair for the synthesis of a cyclic poly(alkyl acrylate)viachain-growth polymerization and subsequent ring-closing without extreme dilution
Source: Royal Society of Chemistry journal article supplement (doi:10.1039/d2py01457b), 2023-01-01
Supplement: d2py01457b1.pdf [file d2py01457b1.pdf]

Supporting Information □□□□□□□□

# Use of a *N*-Hetero Cyclic Carbene (NHC)-Based Interacting Lewis Pair for Synthesis of a Cyclic Poly(alkyl acrylate) via Chain-Growth Polymerization and Subsequent Ring-Closing Without Extreme Dilution

Kota Oto, Yuki Muramatsu, Akinori Takasu\*, Masahiro Higuchi

*Division of Soft Materials,*

*Department of Engineering, Nagoya Institute of Technology,*

*Gokiso-cho, Showa-ku, Nagoya 466-8555, Japan*

Running Head: Interactive Lewis Pair for a Cyclic Poly(alkyl acrylate)

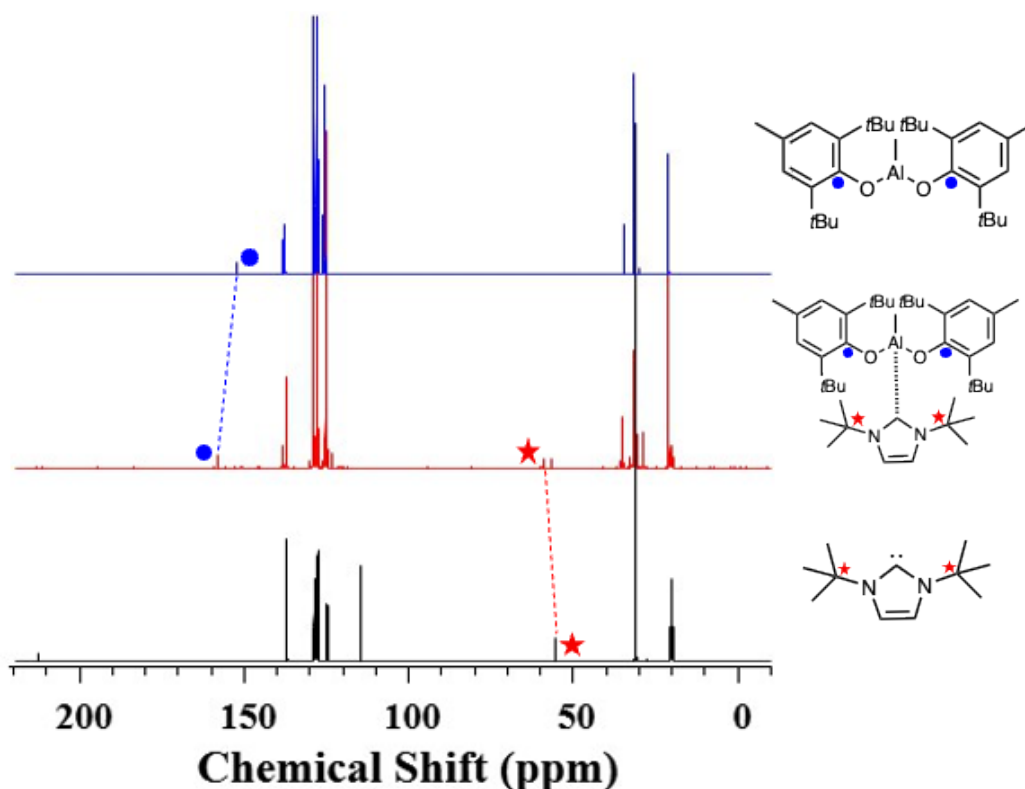

**Figure S1.**  $^{13}\text{C}$ -NMR spectrum of ILP formation between NHC*t*Bu and MAD.

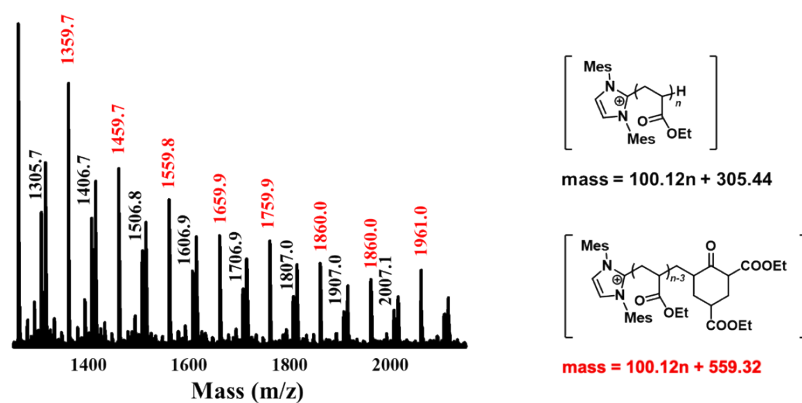

Figure S2. MALDI-TOF mass spectrum of poly(EA) (run 1 in Table 3).

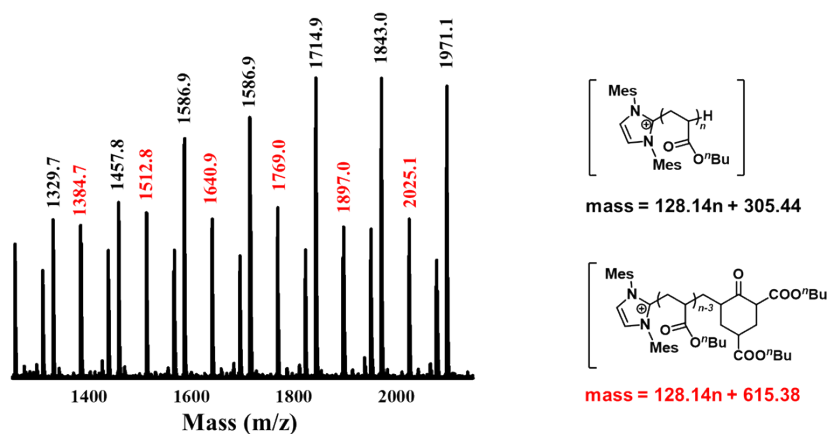

Figure S3. MALDI-TOF mass spectrum of poly(*n*-BA) (run 2 in Table 3).

run 1 in Table 3

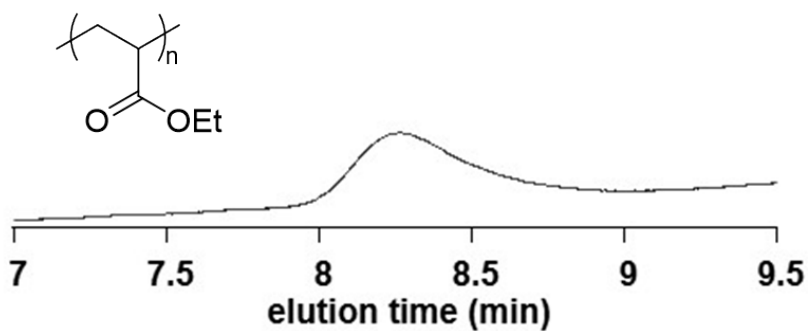

**Figure S4.** SEC curve of poly(EA) initiated by NHCMeS (run 1 in Table 3).

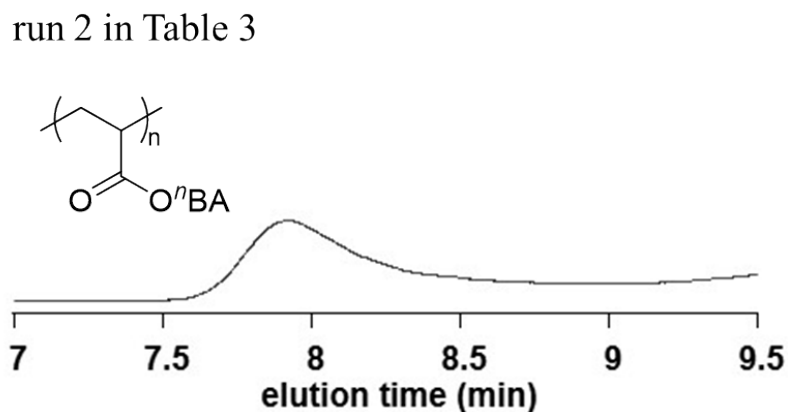

**Figure S5.** SEC curve of poly(*n*-BA) initiated by NHCMeS (run 2 in Table 3).

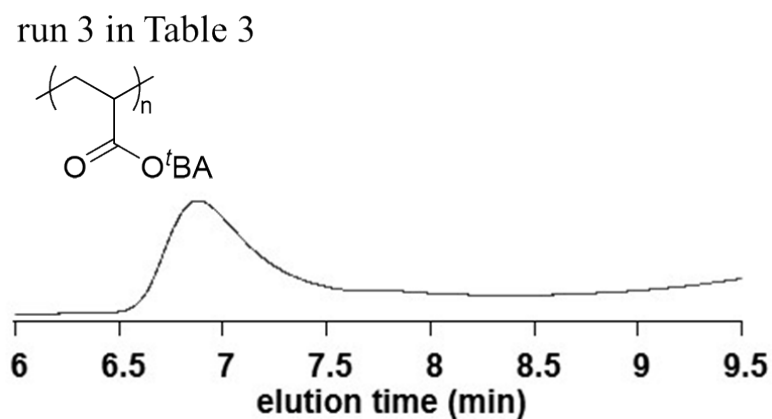

**Figure S6.** SEC curve of poly(*t*-BA) initiated by NHCMeS (run 3 in Table 3).

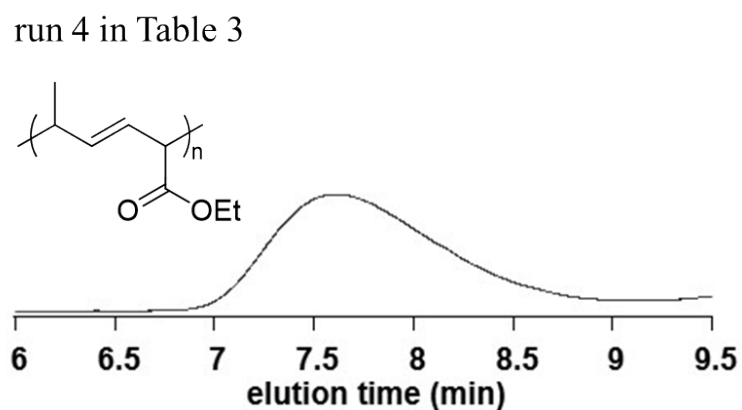

**Figure S7.** SEC curve of poly(ES) initiated by NHCMeS (run 4 in Table 3).

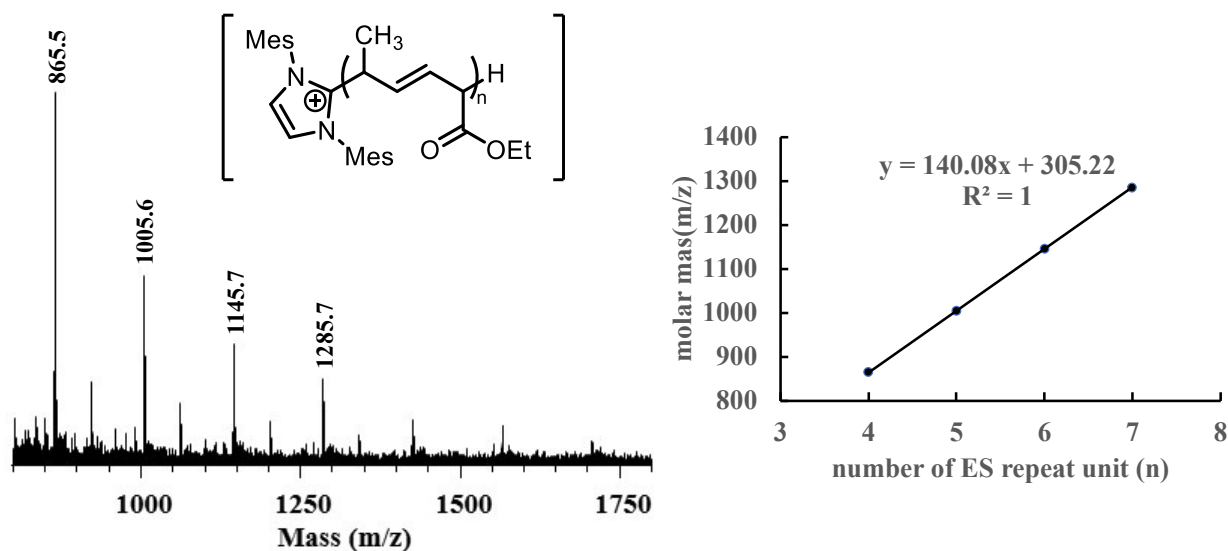

Figure S8. MALDI-TOF mass spectrum of poly(ES) initiated by NHCMeS (run 4 in Table 3).

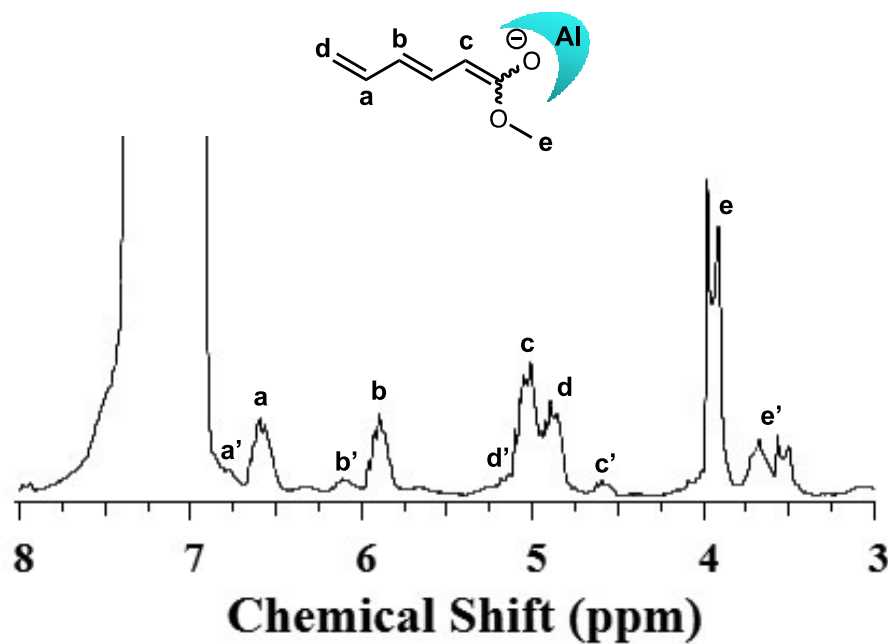

Figure S9. <sup>1</sup>H-NMR spectrum of 1:1 mixture of NHCtBu and MS prepared by toluene-d<sub>8</sub>.

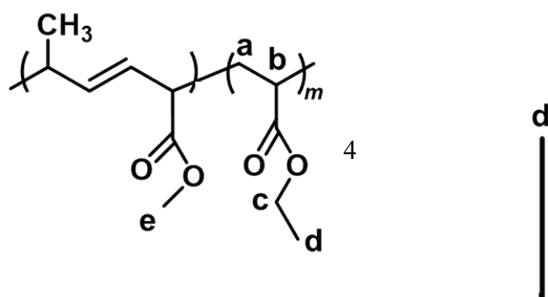

**Figure S10.**  $^1\text{H-NMR}$  spectrum of poly (EA) in  $\text{CDCl}_3$  (run 1, Table 4).

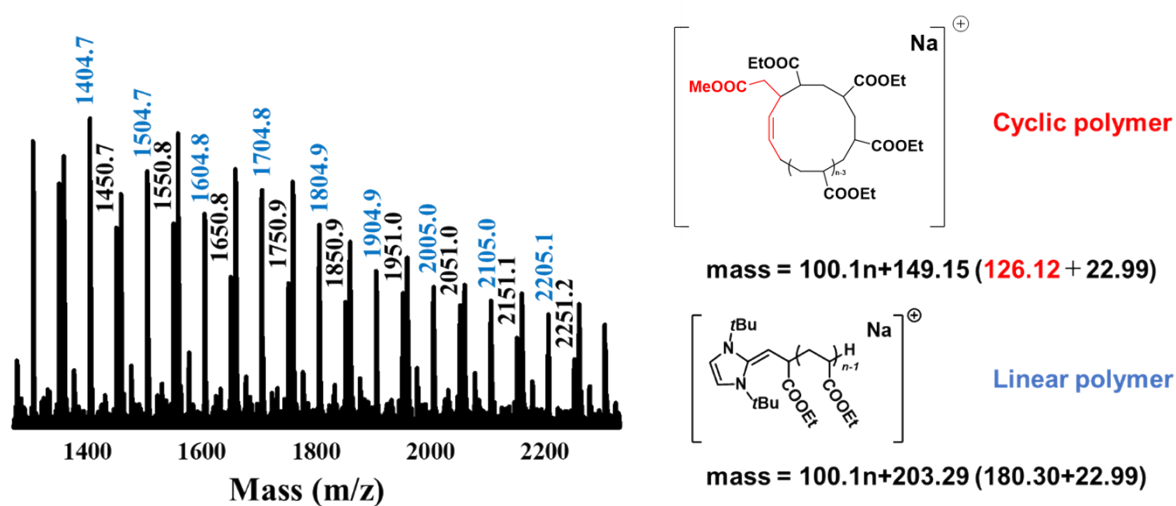

**Figure S11.** MALDI-TOF mass spectrum of poly(EA) (run 1, Table 4).

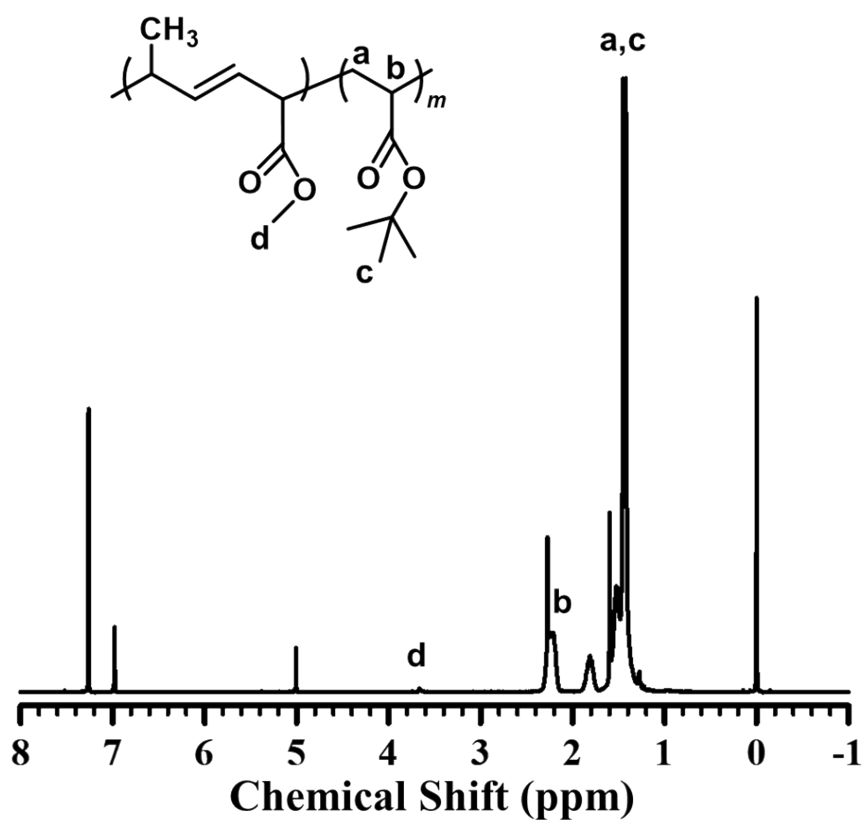

**Figure S12.**  $^1\text{H-NMR}$  spectrum of poly(*t*-BA) in  $\text{CDCl}_3$  (run 6, Table 4).

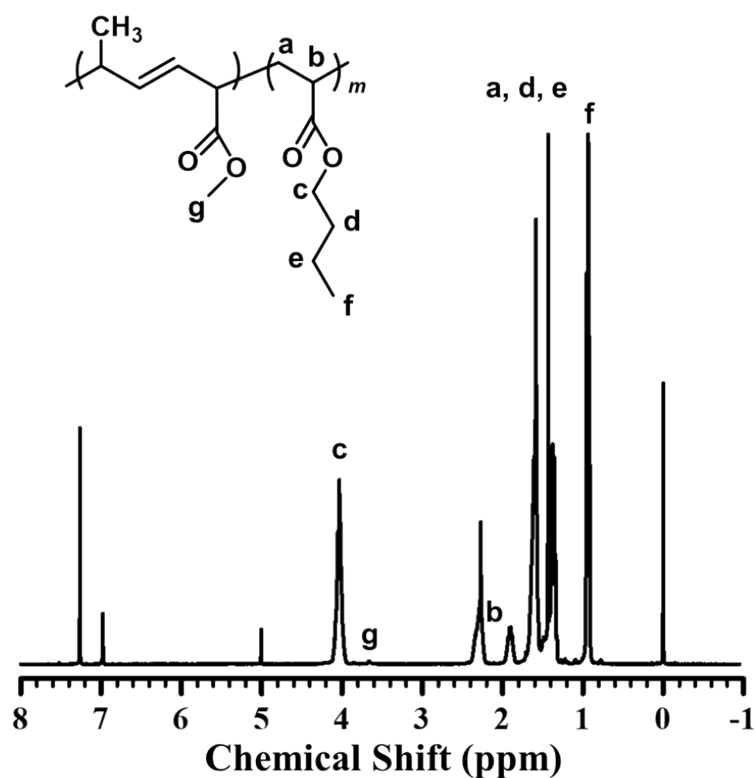

**Figure S13.**  $^1\text{H-NMR}$  spectrum of poly(*n*-BA) in  $\text{CDCl}_3$  (run 8, Table 4).

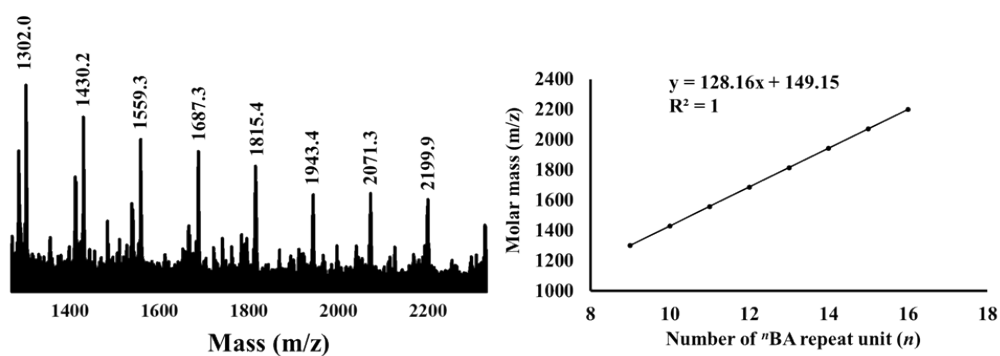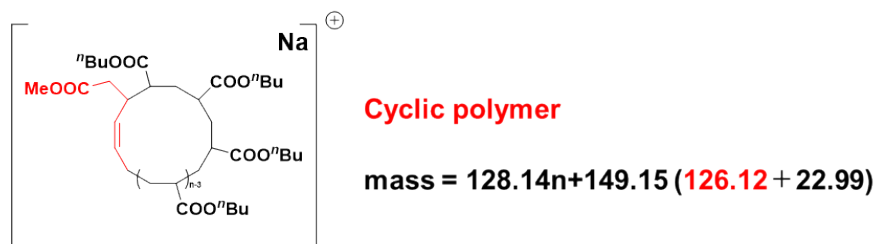

**Figure S14.** MALDI-TOF mass spectrum of poly(*n*-BA) (run 8, Table 4).
